# Supplementary material for: ATP Binding Cassette Transporter Mediates Both Heme and Pesticide Detoxification in Tick Midgut Cells
Source: PubMed Central journal article supplement (PMC4530934; doi:10.1371/journal.pone.0134779), 2015-08-10
Supplement: pone.0134779.s001.pdf [file pone.0134779.s001.pdf]

10 20 30 40 50 60 70 80 90  
RmABC10 MHAFLVLSAGSGLFRQVKN-----RKHVL-----LRFISSKNGGV-----LSNSSAIRRVCPVVK-----  
Dp347276 -----MALVSRLLTSPS-----YSRQV-----ILLVRARCSSL-----ASRSLQSPASPGKNG-----  
DmCG3156 -----MLLNCRTLTHLCTT-----LRVRKSSQ-----IRLSTSYNHHLGRCLHRTARSLQHSLLPPNRYHSHLHPTLRMPW  
Mm\_ABC-me MRAPASARALLIPRRGPA-----VRAWAPAV-----SSRIWLASE--W-TPLVRAWTSLIHKPGSGLRFPPAPLSGLPG  
HsABC10 MRGPPAWPLRLLEPPSPAEPGRLLPVACVWAAASRVPGSLSPFTGLRPARLWGAGPALLWVGGAARRWRSGCRGGPGASR--GVLGLAR  
HsABC8 -----MLVHLFRVGR-----GGPFPGRLL-----PPLRFQTFSAVRYSDGYRSSLRAVAHLRSQWLAHLPRAPLAPR  
HsABC7 -----MALLAMHSWR-----WAAAA-----AAFEKRRHSAI-----LIRPLVSVSGSGPQWRPHQLGALG  
ScMdl1p -----MIVRMIRLC-----KGPKL-----LRSQFASASAL-----YSTKSLFKPPMYQKAEINLIIPH-----  
ScMdl2p -----MLNGRLPLLRGIC-----RNMLSRPRL-----AKLPSIRFRSLVTPSSQLIPLSRLCLRSAPVAGKSLILQSF-----  
ScAtm1p -----MLLLPRCPV-----I-----GRIVRSKFRS-----GLIRNHSPVIFTVSKLSTQRPLLFNS-----

RmABC10 -----SLASVVLCR-----ACSNARRVDSSELRR--LLRQARPE-----RF  
Dp347276 -----GA--NCSWRFFSSTALLRNSGLKTA-----EKVKPKLKS-EVRR--LIGLAKPE-----KY  
DmCG3156 -----WCMRRGFAQSSKWLARNAKANLPTAVGAGIVPA-----PVKMGRSQYGR--LLSLTKSE-----KW  
Mm\_ABC-me -GVGQWATSSGA--RRCWLAGPRAAHPLFARLQGAATG-----VRDLGNDSQRRPAATGRSEVVK--LLGLVRPE-----RG  
HsABC10 -LLGLWARGPGS--CRGAFAGPGAPRLPRARFPGGAAAAGWDEAWRRGPAAPPDGRRLRPAAGLPEAKR--LLGLAYPE-----RR  
HsABC8 RLAAAVGFLLTMSVSI SMSAPFFLGRKIIDVI--YTNPTVDYS--DN-----LTRLCLGLSAVFLCGAAANAI RYV-----LMQTSQG  
HsABC7 -TARAYQQIPESLKSITWQRLGKGNSSGQFLDAKALQVWPLIEKRTCWHGHAGGGLHTDPKEGLKDVDTKRIKAMLSYVWPKDRPDRA  
ScMdl1p -----RKHFLLRSIRLQSDIAQKKSTKPTLKL-----SNANSKSSGFKDIK--LFLVLSKPE-----SK  
ScMdl2p -----RCNSKTVPETSLPASPISKGSARSAH-----AKEQSKTDDYKDIIR--LFMALAKRD-----WK  
ScAtm1p -AVNLWNQAQKDITHKKSVEQFSSAPKVKTVQVKTSKA-----PTLSELKILKD--LFRYIWPKGNKVKRI

RmABC10 RLGAUALLLVSSVMIAPFCIGKVIDVI--YTSSDNAELR-AN-----LNWICKLLTGUVVIGGLANFGRVY-----LMNSSAQ  
Dp347276 RLLGGIGLLFVSSAITMVIPIFAIGKVIDII-----SANQESMVEN-----LTVNSLILVIGIFGAACNFGRTY-----LMSVAGE  
DmCG3156 VLTAGIGCLVSSAITMSVPLFLGKVIDIV--FNKSGMDSAAMAK-----LGEYSVLLFGIFVLGGFANFARVH-----LFGNAAL  
Mm\_ABC-me RLSAAVGLFVAVSSVITMSAPFFLGRIIDVI--YTNPSEGYG--DS-----LTRLCVAVLTCVFLCGAAANGIRVY-----LMQSSGQ  
HsABC8 RLAAGVGLFVAVSSVITMSAPFFLGRIIDVI--YTNPSEGYG--DS-----LTRLCVAVLTCVFLCGAAANGIRVY-----LMQSSGQ  
HsABC7 VLGAVVVALGAALVNVQIPLLLGQLVEVYKTRDHSVGFMTES-----QNLSTHLLILYGVQGLLTFGYLV-----LLSHVGE  
HsABC8 RVAISLGLFGLGAKAMNIVVPMFKYAVDSL--NQMSGMMLNLSDA-----PNTVATMAAVLIGYGVSRAGAAFFNEVRNAVFGKVAQ  
ScMdl1p YIGLALLLILISSVSMVAVSVIGKLLDLA--SESDGEDEEGSKSNKLYGFTKKQFF TALGAVFIIGAVANASRII-----ILKVTGE  
ScMdl2p LLLTALLLITSCSILRQMSIPKVIIGVLDLTI--KTSAGDVFLLDKI-PIFSLPLYEFLSFFTVALLIGCAANFRFI-----LLRILSE  
ScAtm1p RVLIALGLLISAKILNVQVPPFFKQITIDSM-----NIAWDDP-----TVALPAAIGLTILCYGVARFGSVLFGELRNAVFAKVAQ

Tm1

Tm2

RmABC10 RIINSRLKQAHASLMQVEAVFFDRNRTGDLITRLSSDVALVGMSLTQNI SDGLRFAVAVFGVGMMLY-TSPQLSLVGLSVVPPVAIISF  
Dp347276 RITQTMRRNVYAAIVKQDVKFFDKNQTGELVNRSLDSTTLVSKCVTANLADGIRSSALVVSASIMMFY-TSPQIALVGLSIVPPVAGLTI  
DmCG3156 RIVRSLSRSLYRSMMLQEVGWFDTKGTGELINRLSNDTLMVGTSLSQNVSDGLRSVAMIGVGTGMMIY-TSPQLAAVSALVVPAMAGMAI  
Mm\_ABC-me SIVNRLRTSLFSSILRQEVAFDDKTRTGTGELINRLSSDVALLGRSVTENLSDGLRAGAQAQSVGVGMFFF-VSPSLATFVLSVVPVIVSLAV  
HsABC10 RIVNRLRTSLFSSILRQEVAFDDKTRTGTGELINRLSSDVALLGRSVTENLSDGLRAGAQAQSVGVGMFFF-VSPSLATFVLSVVPVIVSLAV  
HsABC8 RMAVDMRRALFSSLLRQDITFFDANKTGQLVSRLLTDDVQEFKSSFKLVISQGLRSCQVAGCLVLSLSM-LSTRLLTLLMVA TPALMGVGT  
HsABC7 NSIRR IAKNVFLHLHNLDLGFHLSRQTGALSKAIDRGTRGISFVLSALVFNLLPIMFEVMLVSGVLYYKCGAQFALVTLGTYTAFTV  
ScMdl1p RLVARLRTRTMKALDQDATFLDTRNVGDLISRLSSDASIVAKSVTQNVSDGTRAI IQGFVGFMMMSF-LSWKLCVMMILAPPLGAMAL  
ScMdl2p RVVARLRTRTMKALDQDATFLDTRNVGDLISRLSSDASIVAKSVTQNVSDGTRAI IQGFVGFMMMSF-LSWKLCVMMILAPPLGAMAL  
ScAtm1p NAIRTVSLQTFQHLMLKLDLWHLRSRQTGGLTRAMDRTGKGISQVLTAMVFHIIPISEFISVVCGLTYQFGASFAAITFSTMLLYSIFTI

Tm3

Tm4

RmABC10 AFARRLRQVADVQTRLAES SATEEQLSNIRTVRAFTEKEFEMNRYSVGLTRLLDKVNTETRLRAVFGCTGATGNMIVLAVLYYGGIIL  
Dp347276 VYGRFVKKITKQVQDALAQATQVTEERISNIRTVRAFQEKREPERYNEQIDHVLTLGYKEAKARGTFFALTGFAGNAIIISGLYGGGLM  
DmCG3156 VYGRYVRRITKVELDKYAEIMKFAEERFNVKTKVTFCREQQEVAAPFDGKLDEALQIGYKTRARAIFFGLTGFCGNFIIISVLYYGGTL  
Mm\_ABC-me IYGRYLRLKLSKATQDSLAEATQLAEERIGNIRTVRAFQEKEMTEVEKYTRVDQLLQLAQKEALARAGFFGAAGLSGNLIVLSVLYKGGLL  
HsABC10 IYGRYLRLKLTKVTDLSAQATQLAEERIGNIRTVRAFQEKEMTEIEKYASKVDHVMQLARKEAFARAGFFGATGLSGNLIVLSVLYKGGLL  
HsABC8 LMGSGRLKLSRQCQEIQIARAMGVADALGNVTRVRAFAMEQREERYGALEACRCRAEELGRGIALFQGLSNIAFNCMVLTGTLF IGSSL  
HsABC7 AVTRWRTRFR IEMNKADNDAGNAIDSLLNYETVKYFNNEREYEAQR YDGFLLTYETASLKSSTLAMLNFQQAIFSVGLTAIMVLASQ  
ScMdl1p IYGRKIRNLSRQLQTSVGLTKVAEEQLNATRTIQAYGGEKNEVRRYAKEVRNVFHIGLKEAVTSGLFFGSGTGLVNTAMLSLLLVGTSM  
ScMdl2p VFGKQIRNTSKDLQEQATGQLTRVAAEQLSGFKTVQSFVAGNELSRYNVAIRDIFVQKTAFTAENAKFFTTSLDGLDLSFLTVPVAYGSL  
ScAtm1p KTTAWRTHFRDRANKADNKAASVALDSLINF EAVKYFNNEKYLADKYNGLMNYRDSQIKVQSLSLAFNLGQNLIFTTALTAMMYMGCTG

Tm5

RmABC10 MSDGRLTVGSLSSFLLYAAVVGVTIGGLGGFFT EATKALGASKVWEIADRVP TLPNFG-G--LALSNLQGVVEFHNVTFAYSRPEIEV  
Dp347276 VADSSLTIVGQLSAFLLYAAVVGISMGGSSSYSEMMLKGLGASTRIWQLIDTRPDIPISG-GPVPAGQFEGRSIRFRDLFSFAYPTRSDVPI  
DmCG3156 VLQDSLITIGALTAFMLYAGYVAISMNGLSNFYSLNKGIGASERIEWELDRECSIPIDK-G-VVPLEKPVGEVGFQNVFFTFPTPESAV  
Mm\_ABC-me MGSAMHTVGE LSSFLMYAFVWGLSIGLSSSFYSELMKGLGAGRLWELLERQPLPFNE-GMVLDEKTFQGALEFRNVHFTYPARPEVS  
HsABC10 MGSAMHTVGE LSSFLMYAFVWGISIGLSSSFYSELMKGLGAGRLWELLEREPKLPNE-GVILNEKSFQGALEFRNVHFTYPARPEVPI  
HsABC8 VAGQQLTGGDLMSFLVASQTVQRSMANLSVLFQGVVRLSAGARVFEYMALNPCIPLSG-GCCVPKEQLRGSVTFQNVCF SYPCRPFGEV  
HsABC7 IVAGTLTVGDLVMVNGLLFQLSPLNFLTGTVYRETRQALIDMNTLFLLLKVDTPQIKDKVMASPLQITPQTATVAFDNVHFY--IEGQKV  
ScMdl1p IQSGSMTVGELSSFFMMYAVYTGSSLFLGSLFFYSELMKGLGAGAAARVFE LNDKRLIRPTI-G-KDPVSLAQKPIVFKNVSTYTPTRPKHQI  
ScMdl2p VLQSLSIGDLTAFMLYTEYTGNAVFGLSFTFYSEIMQGAASRLFELTDRKPSISPTV-G--HKYKPDGRVIEFKDVSF SYPTPRPSVQI  
ScAtm1p VIGGNLTVGDLVLIQLVFLSVPLNFLGSSVYRDLKQSLIDMETLFLKRLKNEVKIKNAE-RPLMLPENVPYDITFENVTFY--HPDRKI

Tm6
