# Supplementary material for: ATP Binding Cassette Transporter Mediates Both Heme and Pesticide Detoxification in Tick Midgut Cells
Source: PubMed Central journal article supplement (PMC4530934; doi:10.1371/journal.pone.0134779), 2015-08-10

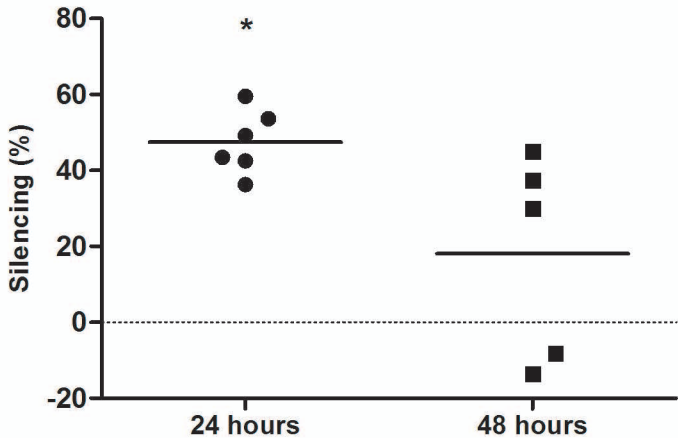

Supplement: pone.0134779.s002.pdf [file pone.0134779.s002.pdf]
